# Supplementary material for: CDK5RAP3 inhibits angiogenesis in gastric neuroendocrine carcinoma by modulating AKT/HIF-1α/VEGFA signaling
Source: PubMed Central journal article supplement (PMC6839262; doi:10.1186/s12935-019-0997-5), 2019-11-07

Figure S1

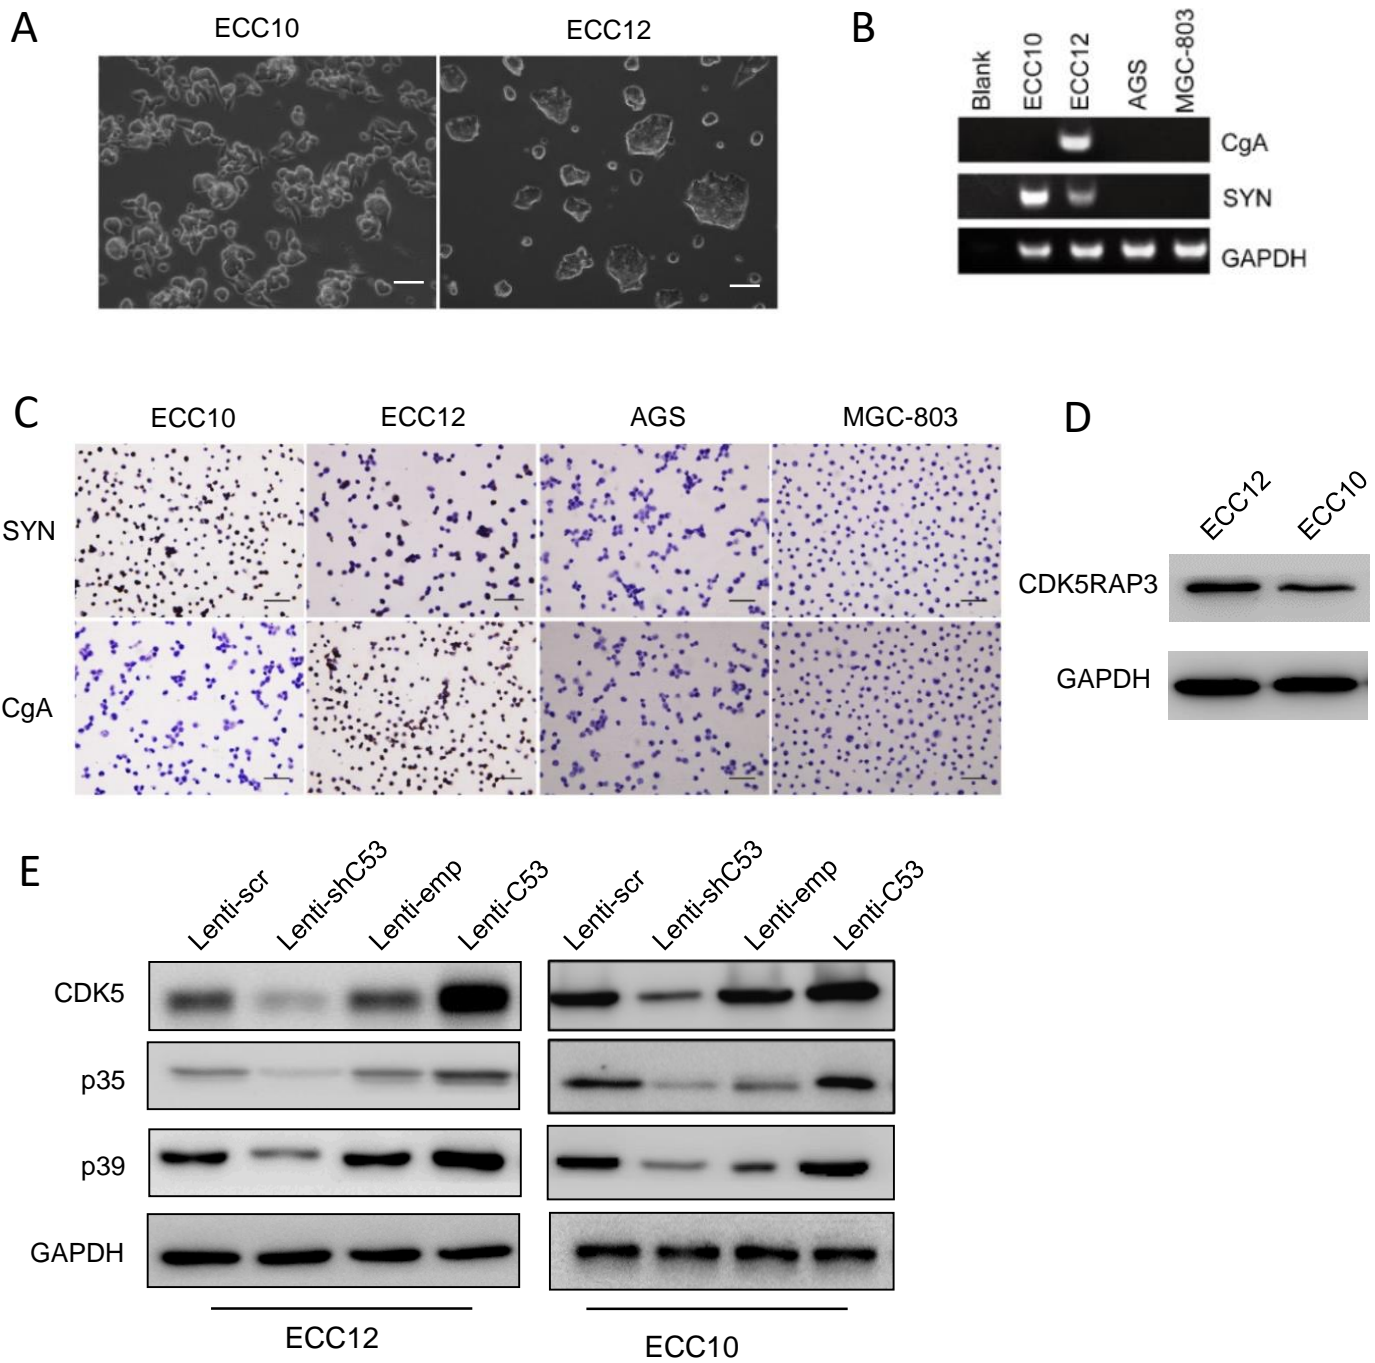

Figure S2

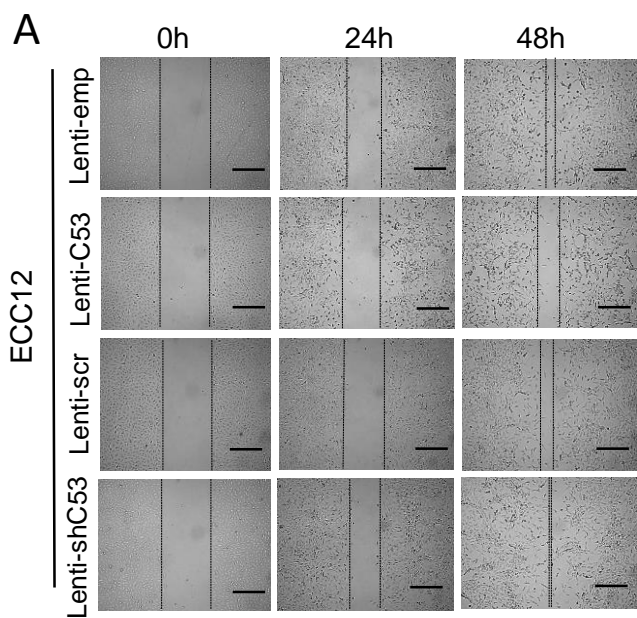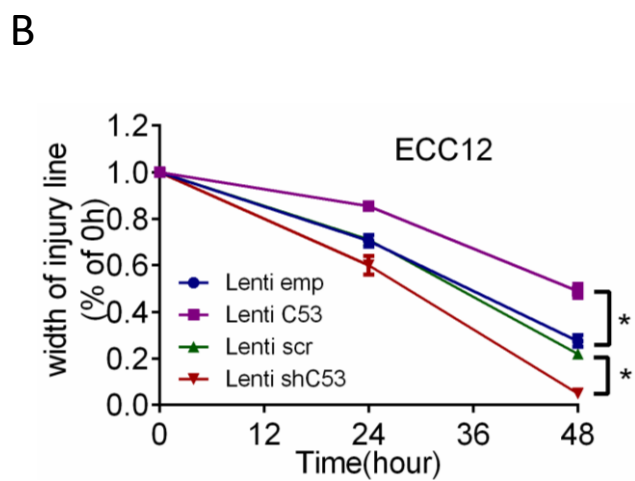

Figure S3

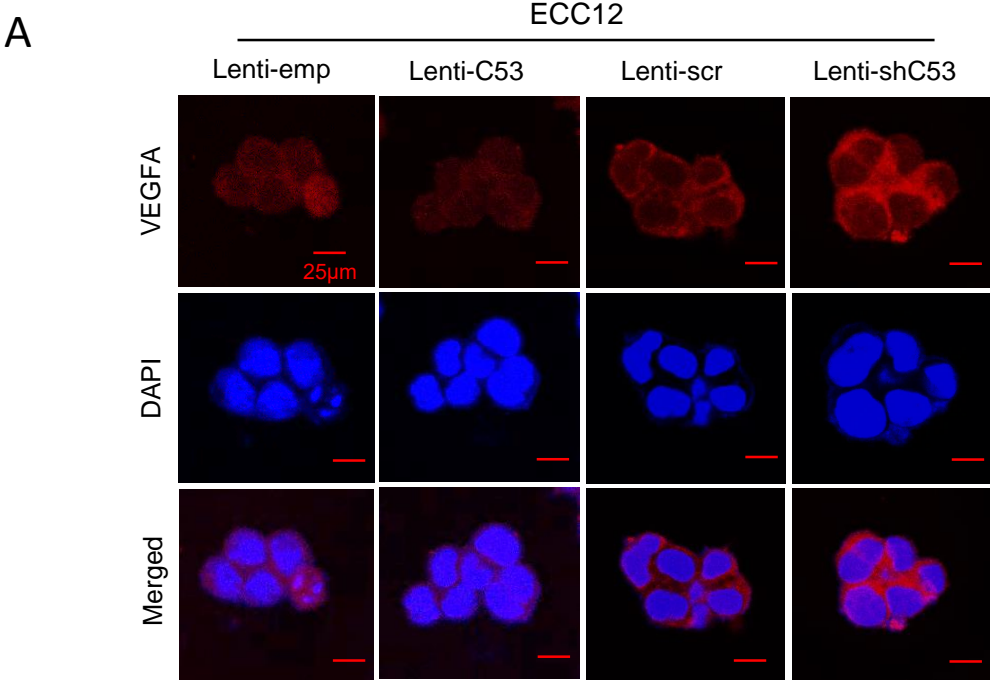

Figure S4

A

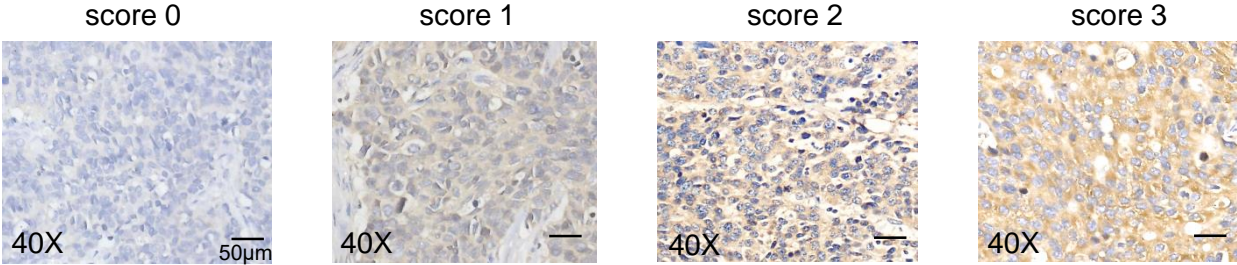

Supplement: 12935_2019_997_MOESM1_ESM.pdf [file 12935_2019_997_MOESM1_ESM.pdf]
